# Supplementary material for: Promotional effect of silver nanoparticle embedded Ga–Zr-codoped TiO2 as an alternative anode for efficient blue, green and red PHOLEDs
Source: Royal Society of Chemistry journal article supplement (doi:10.1039/c9ra01025d), 2019-01-01

**Supporting Information**

**Promotional effect of silver nanoparticles embedded Ga-Zr-codoped TiO<sub>2</sub> as an alternative anode for an efficient blue, green and red PHOLEDs**

**Jayaraman Jayabharathi\*, Pavadai Nethaji, Venugopal Thanikachalam**

*Department of Chemistry, Annamalai University, Annamalainagar 608 002, Tamilnadu, India*

**Figure S1:** HPLC of  $[\text{Ir}(\text{fpi})_3]$ ,  $[\text{Ir}(\text{tfpdni})_2(\text{pic})]$  and  $[\text{Ir}(\text{bbt})_2(\text{acac})]$ .

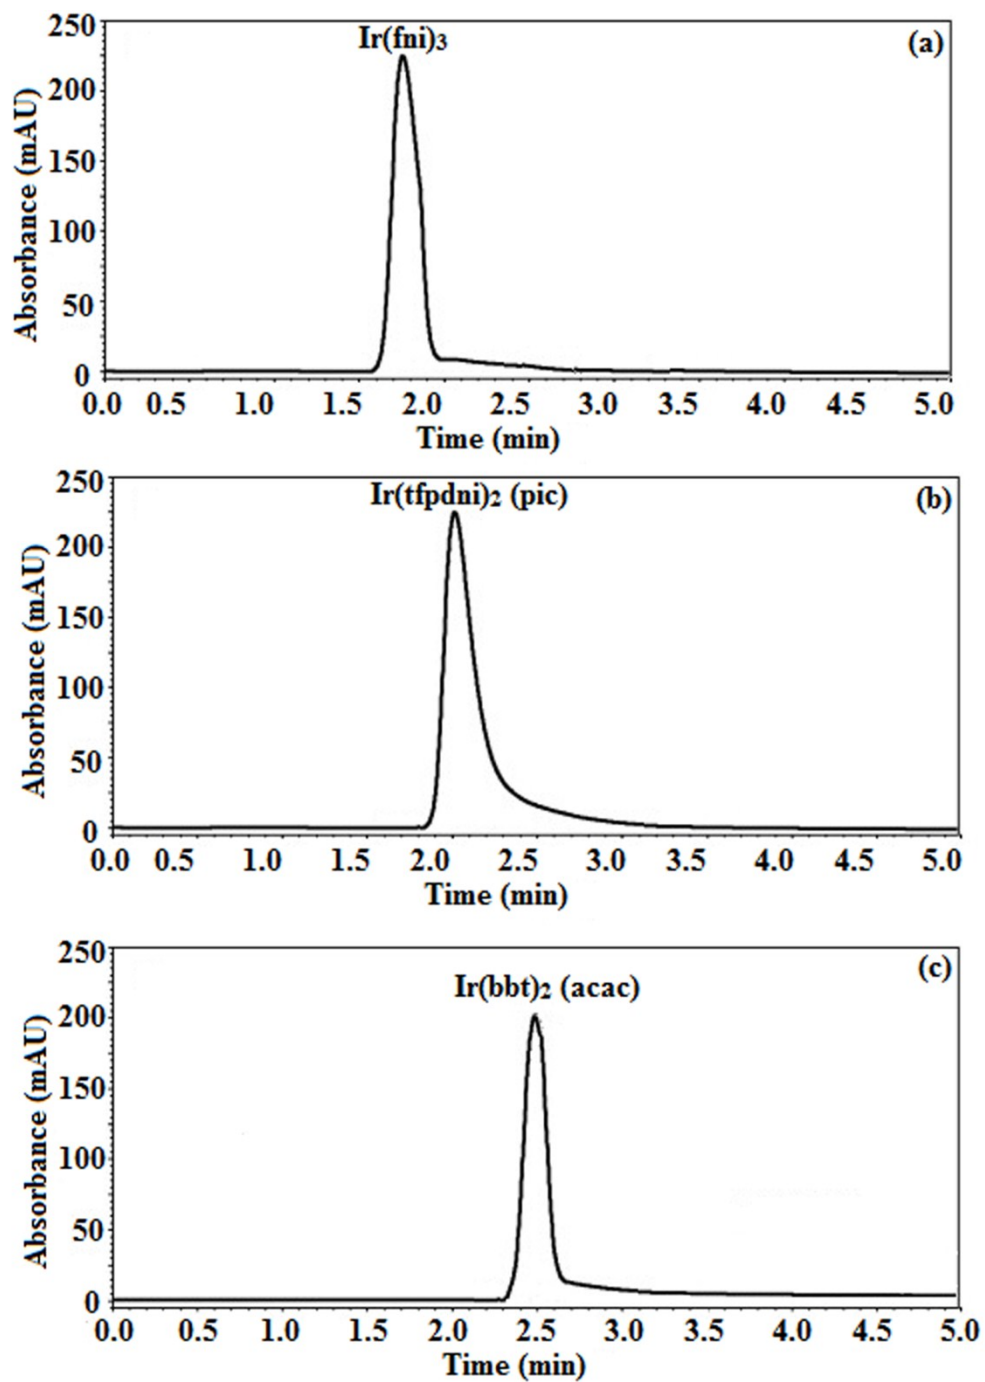

**Figure S2.** X-ray photoelectron spectra (XPS) of Ga-Zr-codoped TiO<sub>2</sub> and Ag/Ga-Zr-codoped TiO<sub>2</sub> film.

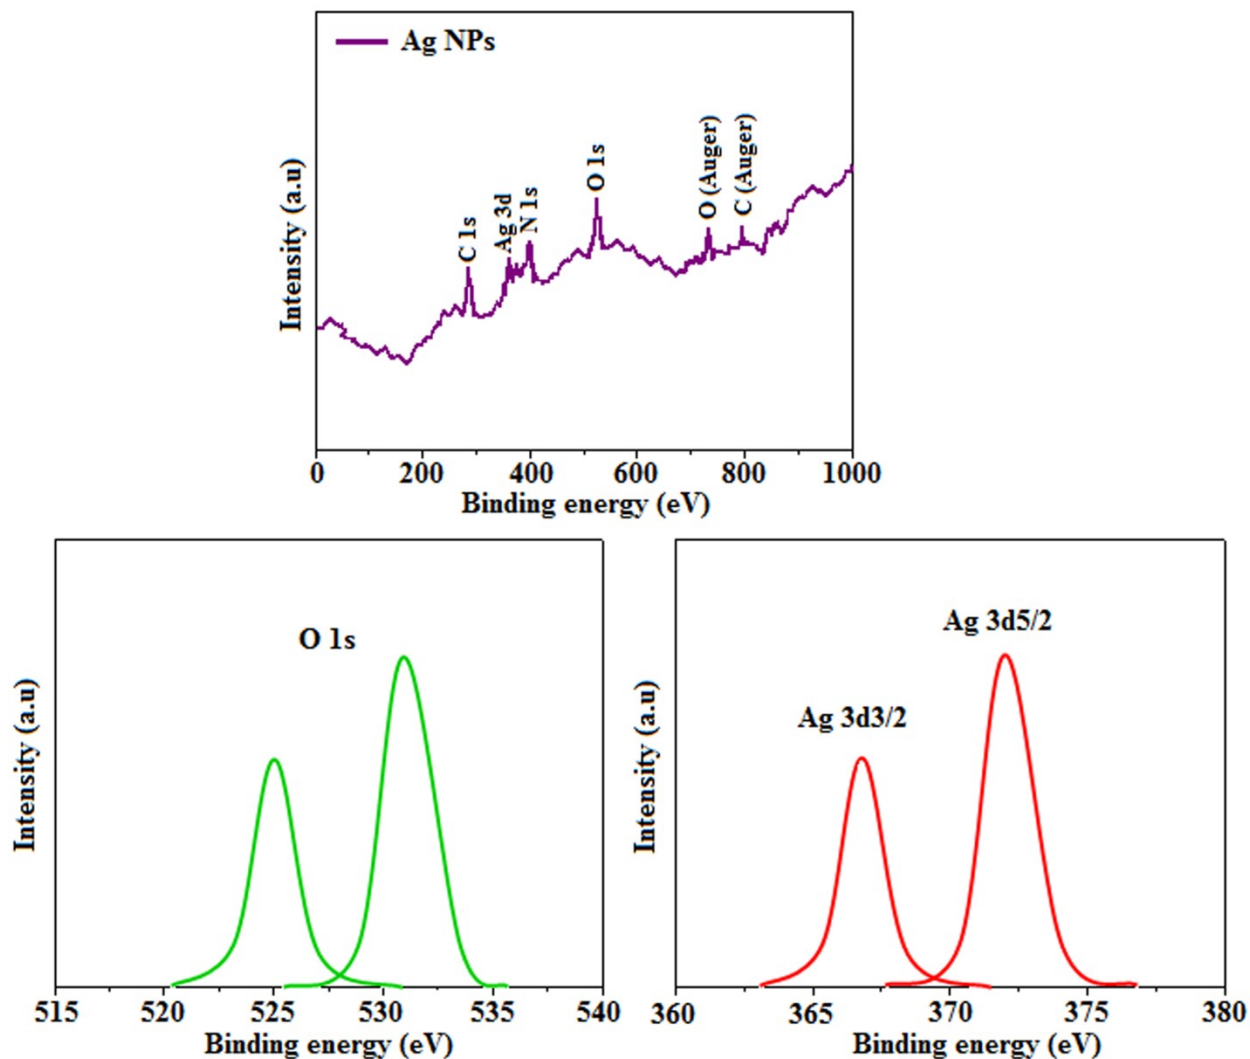

**Figure S3.** Franck - Condon electronic transitions of Ir(tfpdni)<sub>2</sub> (pic) (a) and Ir(bbt)<sub>2</sub> (acac) (b).

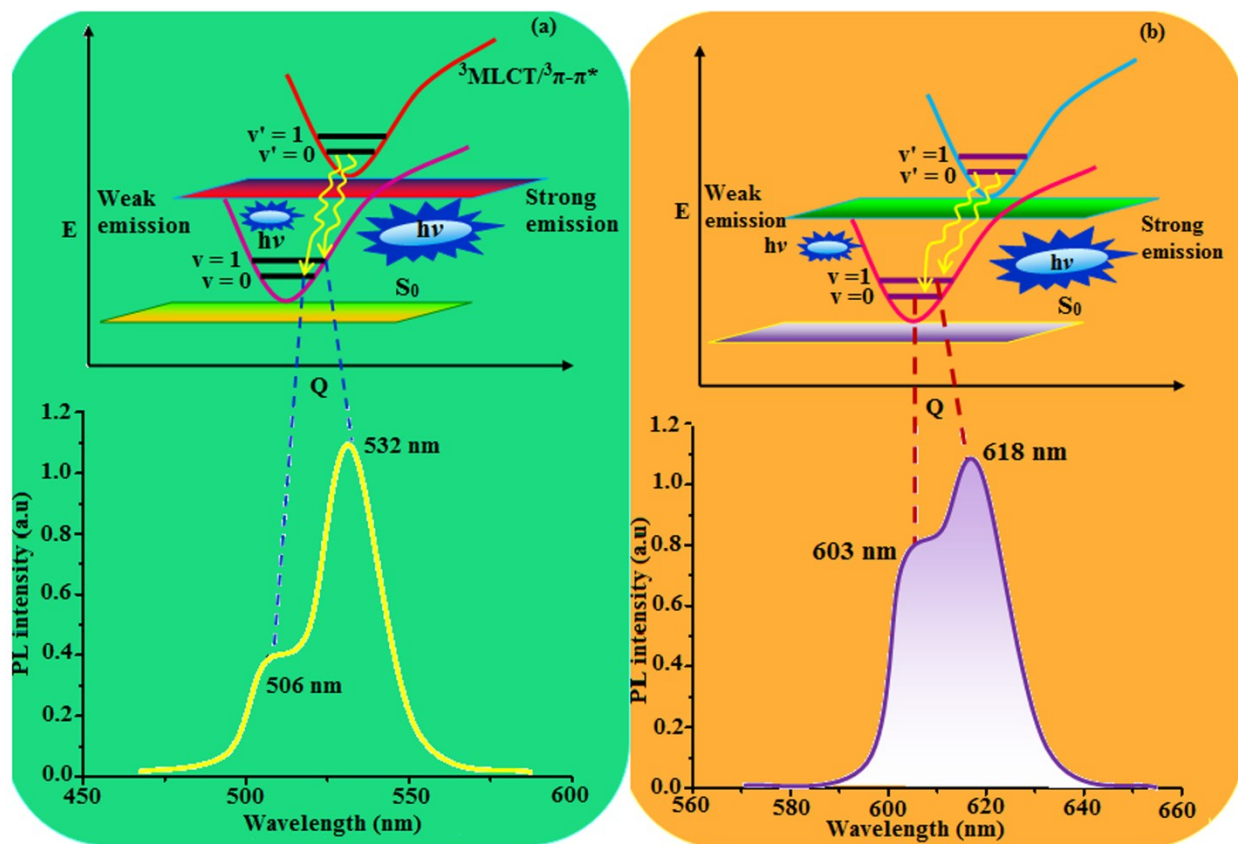

Supplement: c9ra01025d1.pdf [file c9ra01025d1.pdf]
